# Supplementary material for: ZnO-CeO2 Hollow Nanospheres for Selective Determination of Dopamine and Uric Acid
Source: MDPI journal article supplement (doi:10.3390/molecules29081786), 2024-04-15
Supplement: s1 [file s1]

## Supporting Information

### ZnO-CeO<sub>2</sub> Hollow Nanospheres for Selective Determination of Dopamine and Uric Acid

Yaru Zhang <sup>1</sup>, Xiaoxia Yan <sup>1,\*</sup>, Yifan Chen <sup>1</sup>, Dongmei Deng <sup>2</sup>, Haibo He <sup>1</sup>, Yunyi Lei <sup>1</sup> and Liqiang Luo <sup>1,\*</sup>

<sup>1</sup> Department of Chemistry, Shanghai University, Shanghai 200444, China; zyr0825@shu.edu.cn (Y.Z.); chenyifanchem@shu.edu.cn (Y.C.); hbhe2006@shu.edu.cn (H.H.); shyylei@shu.edu.cn (Y.L.)

<sup>2</sup> Department of Physics, Shanghai University, Shanghai 200444, China; dmdeng@shu.edu.cn

\* Correspondence: xxyan@shu.edu.cn (X. Yan); luck@shu.edu.cn (L. Luo); Tel.: +86 21 66132404

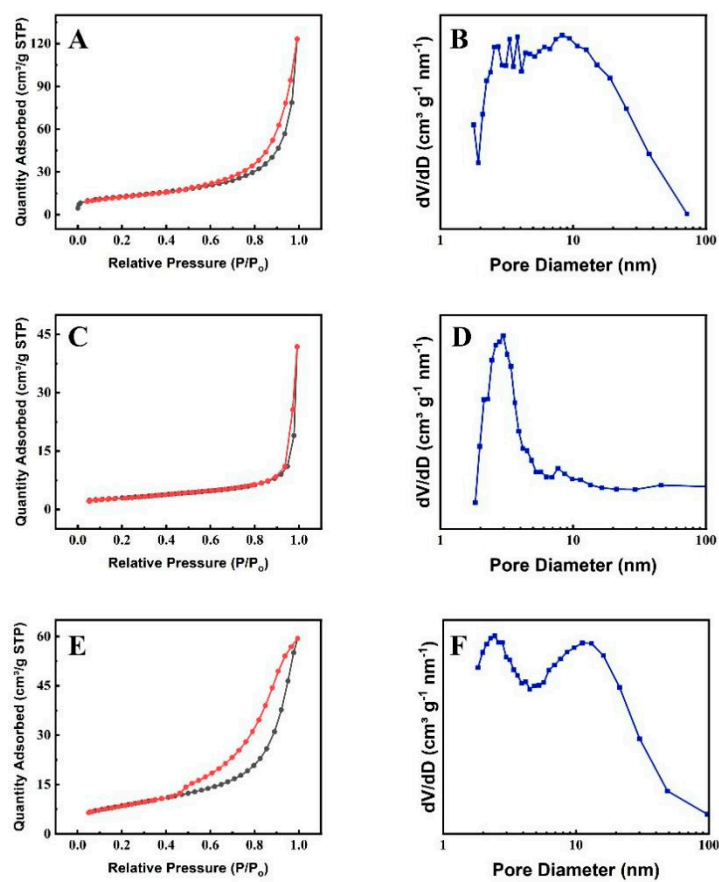

**Figure S1** Nitrogen adsorption/desorption isotherm of ZnO-CeO<sub>2</sub> hollow spheres (A), ZnO (C) and CeO<sub>2</sub> (E). Pore size distribution of ZnO-CeO<sub>2</sub> hollow spheres (B), ZnO (D) and CeO<sub>2</sub> (F).

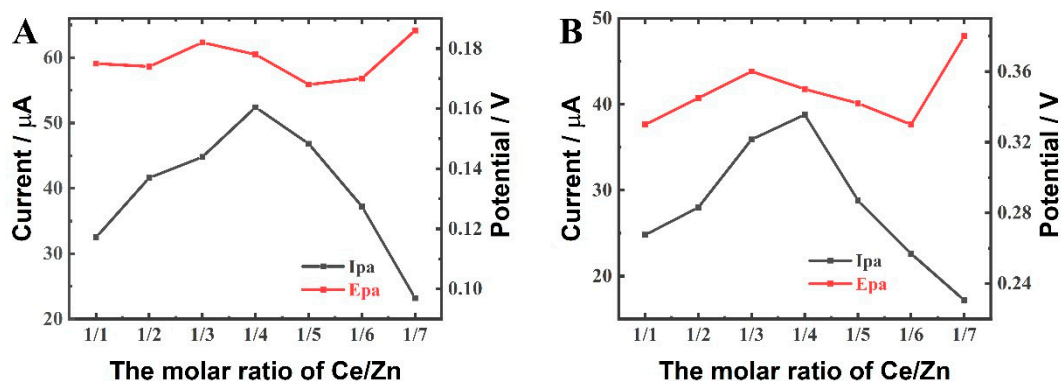

**Figure S2** The plot between the various molar ratios of Ce and Zn against oxidation peak current (Ipa) and oxidation peak potential (Epa) of DA(A) and UA(B).

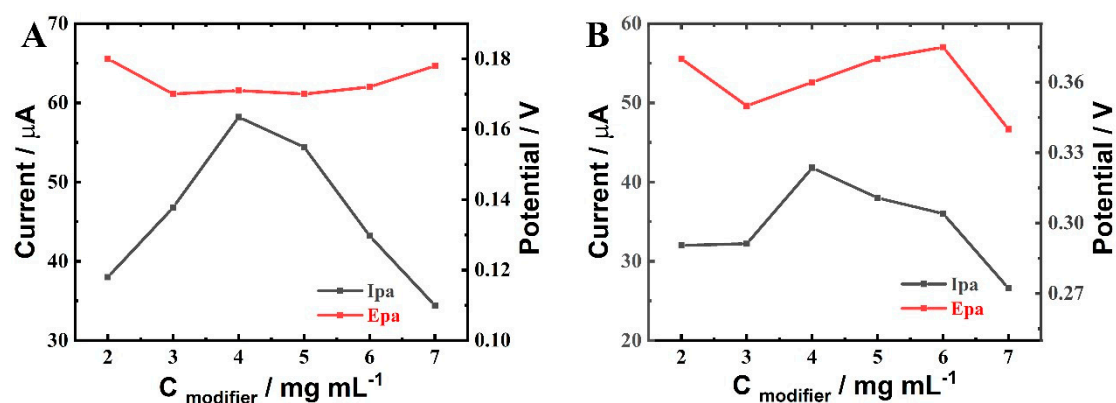

**Figure S3** Surface modification material concentration against oxidation peak current (Ipa) and oxidation peak potential (Epa) of DA(A) and UA(B).

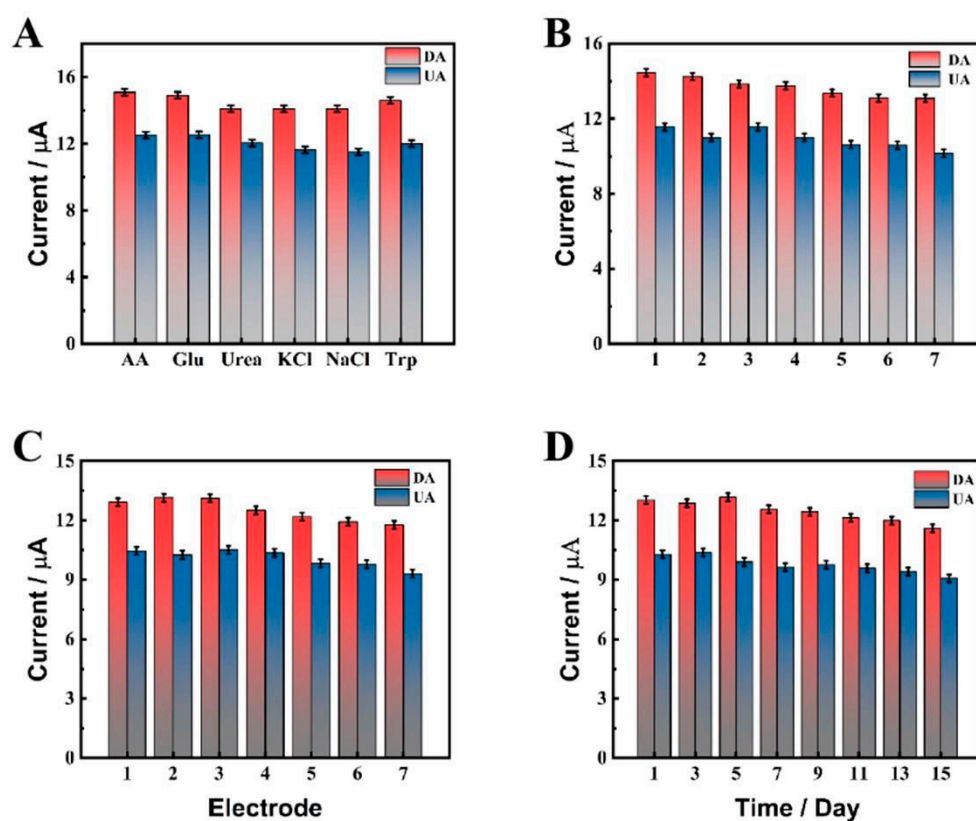

**Figure S4** (A) Current response of ZnO-CeO<sub>2</sub>/GCE to 200  $\mu$ M dopamine, uric acid and 1 mM interferences; (B) The repeatability of ZnO-CeO<sub>2</sub>/GCE electrodes to DA and UA sensing; (C) The reproducibility of ZnO-CeO<sub>2</sub>/GCE electrodes to DA and UA sensing; (D) Long-time stability of ZnO-CeO<sub>2</sub>/GCE.
